# Supplementary material for: Synergetic conversion of microalgae and CO2into value-added chemicals under hydrothermal conditions
Source: Royal Society of Chemistry journal article supplement (doi:10.1039/c8gc03645d), 2019-01-01
Supplement: c8gc03645d1.pdf [file c8gc03645d1.pdf]

## **Electronic Supplementary Information**

### **Synergetic conversion of microalgae and CO<sub>2</sub> into value-added chemicals under hydrothermal conditions**

Yang Yang,<sup>a</sup> Heng Zhong,<sup>\*ab</sup> Runtian He,<sup>a</sup> Xiaoguang Wang,<sup>a</sup> Jiong Cheng,<sup>a</sup> Guodong Yao,<sup>a</sup> and Fangming Jin<sup>\*ab</sup>

<sup>a</sup>School of Environmental Science and Engineering, State Key Lab of Metal Matrix Composites, Shanghai Jiao Tong University, Shanghai 200240, China.

<sup>b</sup>Shanghai Institute of Pollution Control and Ecological Security, Shanghai 200092, P.R. China.

\*Fangming Jin: fmjin@sjtu.edu.cn; Heng Zhong: zhong.h@sjtu.edu.cn.

Number of figures: 11

Number of tables: 6

Number of pages: 23

## Experimental Section

### Materials

In this study, *Spirulina* and *Chlorella* were selected as the representative of microalgae and were purchased from Yunnan Natural Biotech Co., Ltd. and Shandong Binzhou TianJian Biotechnology Co., Ltd., respectively. The solid residue of *Chlorella* after biofuel extraction was also used. The detailed chemical composition of *Spirulina* is shown in Table S1, S2 and S3†, and the ultimate analysis of *Spirulina*, *Chlorella* and *Chlorella* residue can be found in Table S5†. Sodium bicarbonate ( $\text{NaHCO}_3$ , 99.5%, Sinopharm Chemical Reagent Co., Ltd) was used as the  $\text{CO}_2$  source for considerations that  $\text{NaHCO}_3$  is the product of trapping  $\text{CO}_2$  from waste streams by basic solution and also experiential convenience. Bovine serum albumin (BSA, N>13.5%). 2-pyrrolidinone (99%), 2-piperidinone (99%), acetamide were used for mechanism study and were purchased from Sinopharm Chemical Reagent Co., Ltd, Alfa Aesar., Sigma-Aldrich., and J&K Scientific Ltd., respectively.  $\text{NaH}^{13}\text{CO}_3$  (CP,  $\geq 97\%$ ),  $\text{H}^{13}\text{COOH}$  and  $\text{CH}_3^{13}\text{COOH}$  ( $\geq 95\%$ ) were used to determine the carbon source of formate and were bought from Cambridge Isotope Laboratories, Inc. All reagents were used without further purification. Deionized water was used throughout the study.

### Experimental procedures

Experiments were conducted with a series of stainless steel (SUS 316) tubular reactors with two end fittings, giving an inner volume of 5.7 mL. The schematic drawing of the experimental set-up can be found in our previous report.<sup>1</sup> A typical reaction procedure is as follow. The desired amount of  $\text{NaHCO}_3$ , *Spirulina* (0.28 g), and deionized water were loaded into the reactor. Then the reactor was sealed and put into a salt bath that was preheated to the desired temperature. At a selected reaction time, the reactor was removed from the salt bath and immediately

immersed into a cold-water bath to quench the reaction. When BSA (or 2-pyrrolidinone, 2-piperidinone) was used instead of the *Spirulina* in the reaction for mechanism study, or *Chlorella* and its residue were used to expand the microalgae source, their quantities were determined based on the N molar amount, which were the same as that contained in 0.28 g *Spirulina*, namely 2.1 mmol.

### **Definitions**

The reaction time was defined as the duration of the reactor being kept in the salt bath. The water filling was defined as the volume of the solution in the reactor divided by the total inner volume of the reactor. The formate yield was used to evaluate the efficiency of NaHCO<sub>3</sub> reduction by microalgae, and was calculated as follow:

$$\text{Formate Yield} = \frac{\text{Formate from NaHCO}_3 \text{ (mmol/L)}}{\text{The intial NaHCO}_3 \text{ (mmol/L)}}$$

### **Analytical methods**

All liquid samples were collected, filtered through a 0.22 μm syringe filter and then analyzed by high-performance liquid chromatography (HPLC), gas chromatography-mass spectrometry (GC-MS), gas chromatography-flame ionization detector (GC-FID) and <sup>13</sup>C-quantitative nuclear magnetic resonance (<sup>13</sup>C-QNMR). Gaseous samples were analyzed by gas chromatography-thermal conductivity detector (GC-TCD).

#### **1) High-performance liquid chromatography (HPLC)**

The HPLC analysis was performed on an Agilent 1200 system, which was equipped with two KC-811 columns (SHODEX) for sample separation and a tunable UV/Vis absorbance detector adjusted at 210 nm for sample detection. 2 mmol/L HClO<sub>4</sub> solution at a flow rate of 1.0 mL/min was used as the mobile phase. The concentration of formate, acetate and propionate were

quantified by HPLC, and were obtained using the external standard method based on the average values of at least three parallel experiments.

## **2) Gas chromatography-mass spectrometry (GC-MS)**

GC-MS analysis was used for product identification. A Hewlett-Packard model 7890A GC system equipped with a model 5975C mass selective detector (MSD) was used. Separation of samples was achieved with an Agilent 19091N-233HP-INNOWax Polyethylene Glyco column (30 m x 250  $\mu\text{m}$  x 0.5  $\mu\text{m}$ ) with He as carrier gas at a flow rate of 1 mL/min. The oven temperature was initially held at 40  $^{\circ}\text{C}$  for 4 min, and then procedurally increased at a rate of 7  $^{\circ}\text{C}/\text{min}$  to a final temperature of 230  $^{\circ}\text{C}$  and was held for 20 min.

## **3) Gas chromatography-flame ionization detector (GC-FID)**

The concentration of N-methyl-2-pyrrolidinone, 2-pyrrolidinone and 2-piperidinone were quantified by GC-FID, using the external standard method based on the average values of at least three parallel experiments. A Hewlett-Packard model 5890 Series II GC system equipped with a flame ionization detector (FID) was used. The samples separation was achieved with an Agilent 19091N-233HP-INNOWax Polyethylene Glyco column (30 m x 250  $\mu\text{m}$  x 0.5  $\mu\text{m}$ ), and He at a flow rate of 1 mL/min was used as the carrier gas. The program procedures for oven operation were the same to GC-MS analysis.

## **4) $^{13}\text{C}$ -quantitative nuclear magnetic resonance ( $^{13}\text{C}$ -QNMR)**

$^{13}\text{C}$ -QNMR analysis was used to determine the concentration of formate from  $\text{NaHCO}_3$ . Before analysis, liquid sample was sealed with 100 mmol/L  $\text{CH}_3^{13}\text{COOH}$  as the internal standard in a NMR tube (5 mm i.d.).  $^{13}\text{C}$ -QNMR analysis was then performed on a Bruker Avance III 600 MHz NMR-Spectrometer.

The calculation of  $\text{H}^{13}\text{COOH}$  concentration was based on the following formula:

$$y=0.5414x+0.135, R^2=0.9975$$

where  $x$  represents  $H^{13}COOH$  concentration/ $CH_3^{13}COOH$  concentration, and  $y$  represents  $H^{13}COOH$  area/ $CH_3^{13}COOH$  area in  $^{13}C$ -QNMR spectra.

The formula was obtained by examining the ratio of  $H^{13}COOH$  to  $CH_3^{13}COOH$  based on the peak area in the  $^{13}C$ -QNMR spectra when varying the concentration of  $H^{13}COOH$  and  $CH_3^{13}COOH$ . The peak area ratios with different concentrations of  $H^{13}COOH$  and  $CH_3^{13}COOH$  are summarized in Table S6†.

### **5) Gas chromatography-thermal conductivity detector (GC-TCD)**

GC-TCD analysis was used to determine the gaseous reducing products from  $CO_2$ . A HP-5890 Series II with an HP-1 packing column was used.

## Tables and figures

**Table S1 Basic chemical composition of *Spirulina***

| Chemical composition                    | Protein | Carbohydrate | Lipid | Water | Ash |
|-----------------------------------------|---------|--------------|-------|-------|-----|
| Relative amount in <i>Spirulina</i> (%) | 70      | 12           | 9     | 6     | 3   |

**Table S2 Amino acids compositions of the protein contained in *Spirulina*<sup>2</sup>**

| Protein       | composition (%) |
|---------------|-----------------|
| Alanine       | 7.2             |
| Arginine      | 6.7             |
| Aspartic acid | 8.7             |
| Glutamic acid | 11.1            |
| Glycine       | 5               |
| Histidine     | 2.0             |
| Isoleucine    | 6.3             |
| Leucine       | 8.3             |
| Lysine        | 4.2             |
| Methionine    | 0.9             |
| Phenylalanine | 5.4             |
| Proline       | 4.0             |
| Serine        | 4.0             |
| Threonine     | 4.4             |
| Tyrosine      | 4.1             |
| Valine        | 6.7             |
| Other         | 11              |

**Table S3 Lipids profile of the tested *Spirulina*<sup>3</sup>**

|                      | Lipid                      | Composition (%) |
|----------------------|----------------------------|-----------------|
| Non-polar lipid (9%) | Pigments and polar lipids  | 0.86            |
|                      | Monoglycerides             | 0.74            |
|                      | Free sterols               | 0.14            |
|                      | Diglycerides               | 0.32            |
|                      | Free fatty acids           | 6.2             |
|                      | Triglycerides              | 0.74            |
| Polar lipid (91%)    | Sterol esters, waxes, etc. | 3.9             |
|                      | Digalactosyl diglyceride   | 22.5            |
|                      | Phosphatidyl glycerol      | 23.6            |
|                      | Unresolved lipid           | 41              |

Main component fatty acid is palmitic acid.



**Table S4 Major products for the *Spirulina*/BSA/glucose/palmitic acid reaction with or without NaHCO<sub>3</sub><sup>a</sup>**

|                  |                            | Products concentration (mmol/L) |         |            |                          |                 |                |
|------------------|----------------------------|---------------------------------|---------|------------|--------------------------|-----------------|----------------|
|                  |                            | Formate                         | Acetate | Propionate | N-methyl-2-pyrrolidinone | 2-pyrrolidinone | 2-piperidinone |
| <i>Spirulina</i> | With NaHCO <sub>3</sub>    | 114.5 <sup>b</sup>              | 76.4    | 37.5       | 16.3                     | 4.2             | 6.6            |
|                  | Without NaHCO <sub>3</sub> | 5.3                             | 19.2    | 3.4        | 7.5                      | 40.9            | 35.6           |
| BSA              | With NaHCO <sub>3</sub>    | 106.6 <sup>b</sup>              | 40.4    | 40.5       | 15.6                     | 7.6             | 8.7            |
|                  | Without NaHCO <sub>3</sub> | 3.5                             | 16.2    | 3.2        | 6.8                      | 42.7            | 36.4           |
| Glucose          | With NaHCO <sub>3</sub>    | 7.3 <sup>b</sup>                | 25.8    | -          | -                        | -               | -              |
|                  | Without NaHCO <sub>3</sub> | 2.3                             | 2.7     | -          | -                        | -               | -              |
| Palmitic acid    | With NaHCO <sub>3</sub>    | -                               | -       | -          | -                        | -               | -              |
|                  | Without NaHCO <sub>3</sub> | -                               | -       | -          | -                        | -               | -              |

<sup>a</sup>Reaction conditions: 1.2 mol/L NaHCO<sub>3</sub>, 0.28 g *Spirulina*, 0.75 mol/L BSA, 0.13 mol/L glucose, 0.09 mol/L palmitic acid, 300 °C, 2 h, 50% water filling.

<sup>b</sup>Total formate concentration, which consists of formate from NaHCO<sub>3</sub> reduction and *Spirulina* model compounds conversion.

**Table S5 Ultimate analysis of *Spirulina*, *Chlorella* and *Chlorella* residue<sup>a</sup>**

|                          | C (wt %) | O (wt %) | N (wt %) | H (wt %) | Else (Ca S P) (wt %) |
|--------------------------|----------|----------|----------|----------|----------------------|
| <i>Spirulina</i>         | 48.2     | 34.3     | 10.7     | 6.8      | 0.6                  |
| <i>Chlorella</i>         | 45       | 39.84    | 8.26     | 6.8      | 0.1                  |
| <i>Chlorella</i> residue | 40.2     | 43.84    | 8.4      | 6.3      | 1.26                 |

<sup>a</sup>Results were obtained with the elemental analyzer (Vario EL III).

**Table S6  $^{13}\text{C}$ -QNMR analysis of  $\text{H}^{13}\text{COOH}$  and  $\text{CH}_3^{13}\text{COOH}$** 

| Entry | $\text{H}^{13}\text{COOH}$<br>concentration<br>(mmol/L) | $\text{CH}_3^{13}\text{COOH}$<br>concentration<br>(mmol/L) | $\text{H}^{13}\text{COOH}$<br>concentration/<br>$\text{CH}_3^{13}\text{COOH}$<br>concentration | $\text{H}^{13}\text{COOH}$ area/<br>$\text{CH}_3^{13}\text{COOH}$<br>area |
|-------|---------------------------------------------------------|------------------------------------------------------------|------------------------------------------------------------------------------------------------|---------------------------------------------------------------------------|
| 1     | 50                                                      | 100                                                        | 0.5                                                                                            | 0.39                                                                      |
| 2     | 100                                                     | 100                                                        | 1.0                                                                                            | 0.70                                                                      |
| 3     | 100                                                     | 50                                                         | 2.0                                                                                            | 1.21                                                                      |

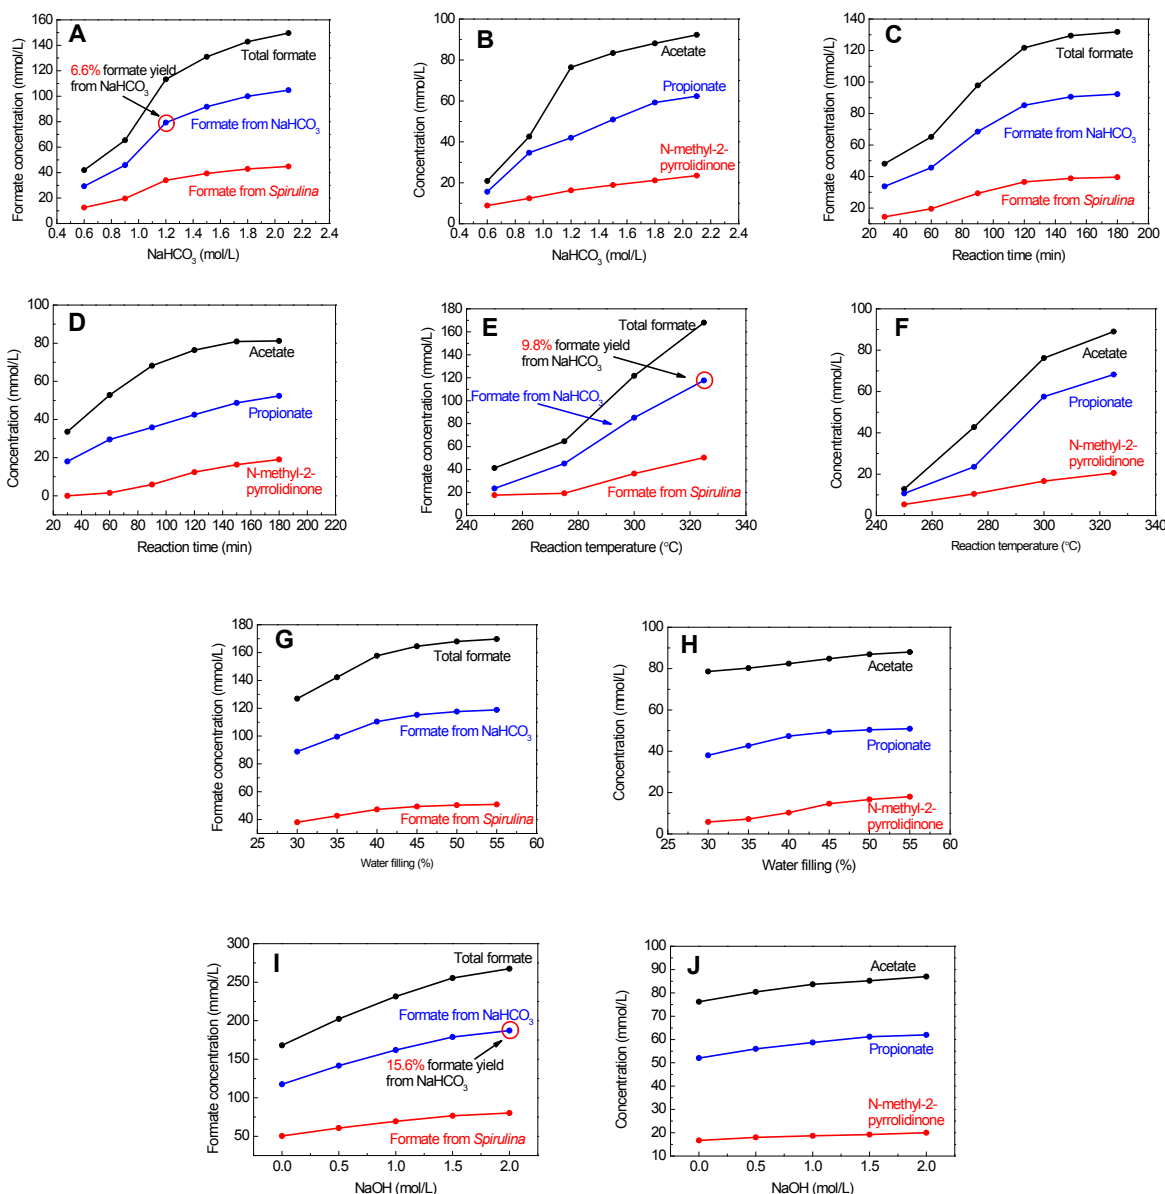

**Fig. S1** Effect of initial NaHCO<sub>3</sub> concentration (A and B), reaction time (C and D), temperature (E and F), water filling (G and H) and NaOH concentration (I and J) on the conversion of *Spirulina* and NaHCO<sub>3</sub> (Reaction condition: (A and B) 0.28 g *Spirulina*, 300 °C, 2 h, 50% water filling; (C and D) 1.2 mol/L NaHCO<sub>3</sub>, 0.28 g *Spirulina*, 300 °C, 50% water filling; (E and F) 1.2 mol/L NaHCO<sub>3</sub>, 0.28 g *Spirulina*, 2 h, 50% water filling; (G and H) 1.2 mol/L NaHCO<sub>3</sub>, 0.28 g *Spirulina*, 325 °C, 2 h; (I and J) 1.2 mol/L NaHCO<sub>3</sub>, 0.28 g *Spirulina*, 325 °C, 2 h, 50% water filling).

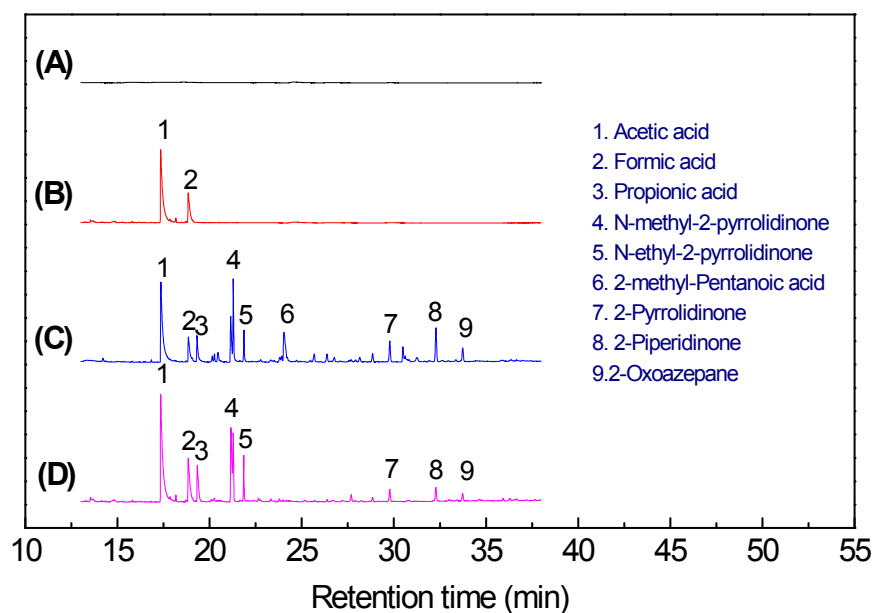

**Fig. S2** GC-MS chromatograms of liquid samples for the reaction of NaHCO<sub>3</sub> with palmitic acid (A), glucose (B), bovine serum albumin (BSA) (C) or *Spirulina* (D) (1.2 mol/L NaHCO<sub>3</sub>, 0.09 mol/L palmitic acid, 0.13 mol/L glucose, 0.75 mol/L BSA, 0.28 g *Spirulina*, 2 h, 300 °C, 50% water filling).

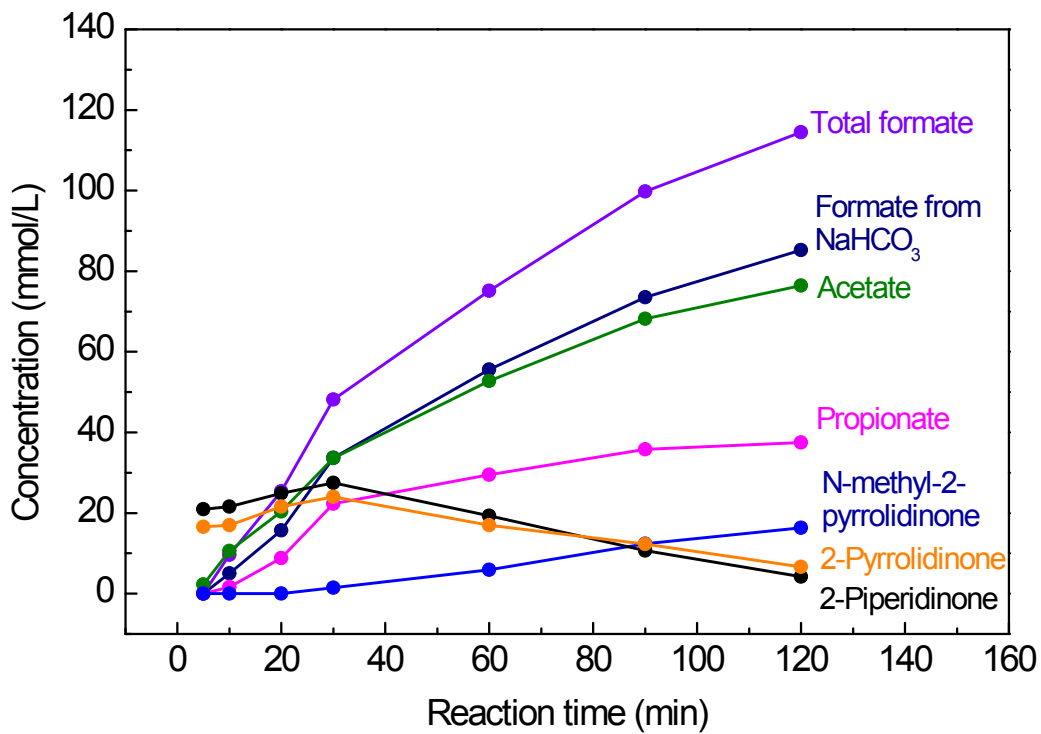

**Fig. S3** Product concentration as function of time obtained in the reaction of *Spirulina* with NaHCO<sub>3</sub> (1.2 mol/L NaHCO<sub>3</sub>, 0.28 g *Spirulina*, 300 °C, 50% water filling).

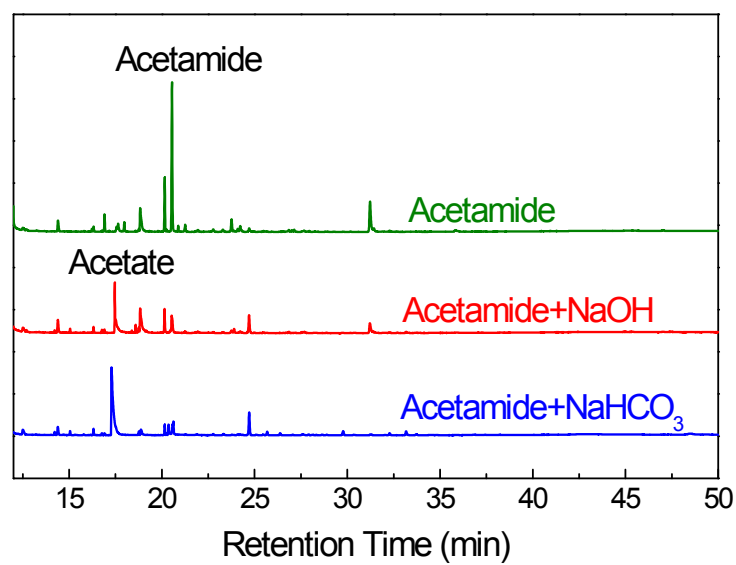

**Fig. S4** GC-MS chromatograms of liquid samples for the reaction of acetamide with NaOH or NaHCO<sub>3</sub> (1 mol/L acetamide, 1 mol/L NaHCO<sub>3</sub>, 1 mol/L NaOH, 2 h, 300 °C, 50% water filling).

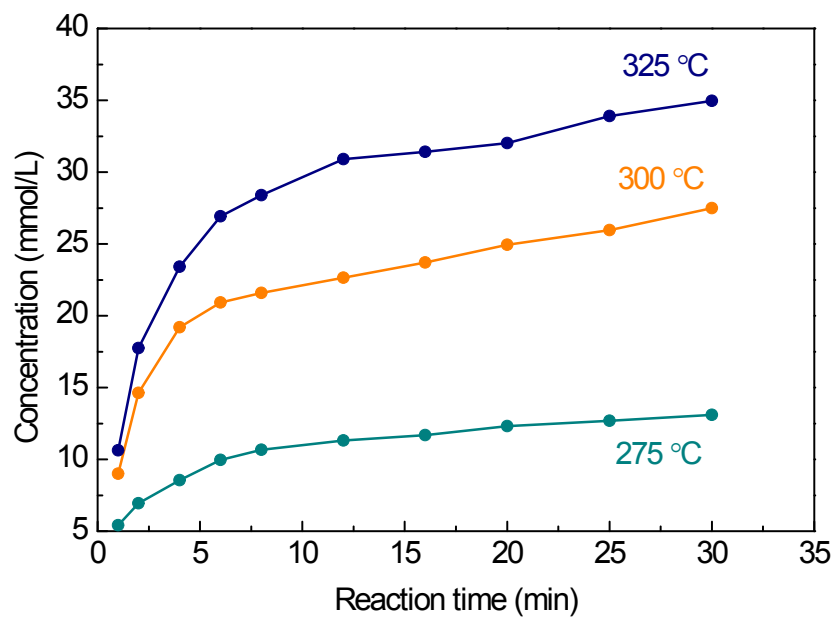

**Fig. S5** Kinetic information of lactam (2-pyrrolidinone) formation from the reaction of *Spirulina* with NaHCO<sub>3</sub> (1.2 mol/L NaHCO<sub>3</sub>, 0.28 g *Spirulina*, 300 °C, 50% water filling).



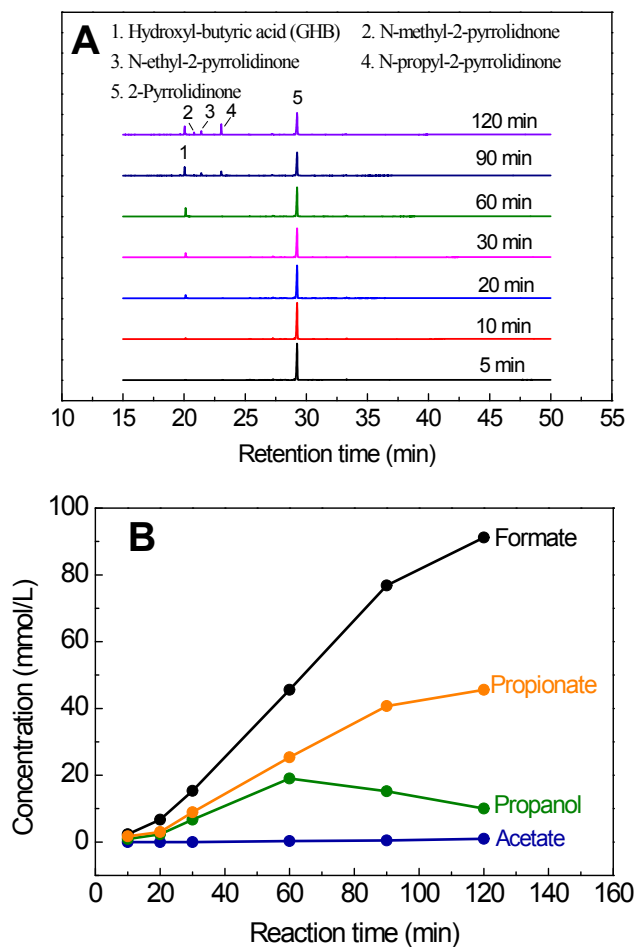

**Fig. S6** GC-MS chromatograms (A) and products variation with time (B) from the reaction of 2-pyrrolidinone with  $\text{NaHCO}_3$  (Reaction conditions: 1.2 mol/L  $\text{NaHCO}_3$ , 0.75 mol/L 2-pyrrolidinone, 300 °C, 50% water filling).

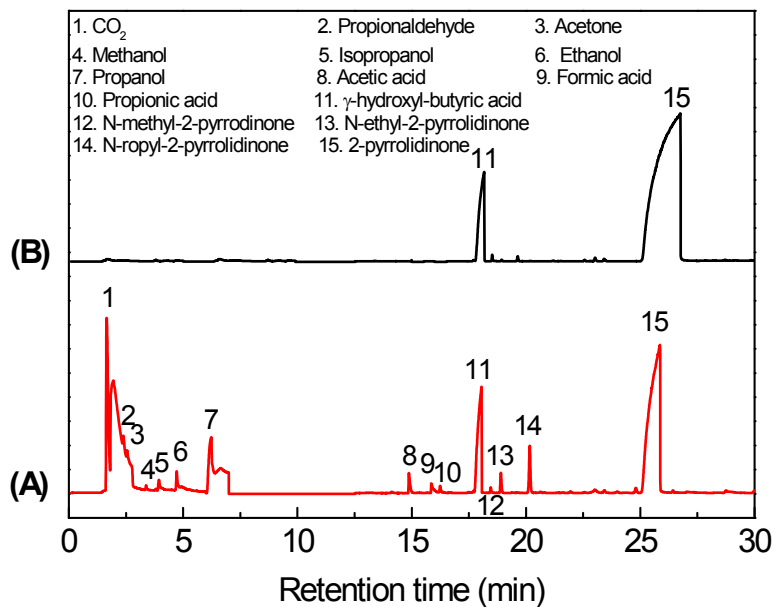

**Fig. S7** GC-MS chromatograms of liquid samples after the reaction of 2-pyrrolidinone with (A) or without NaHCO<sub>3</sub> (B) (1.2 mol/L NaHCO<sub>3</sub>, 0.75 mol/L 2-pyrrolidinone, 2 h, 300 °C, 50% water filling).

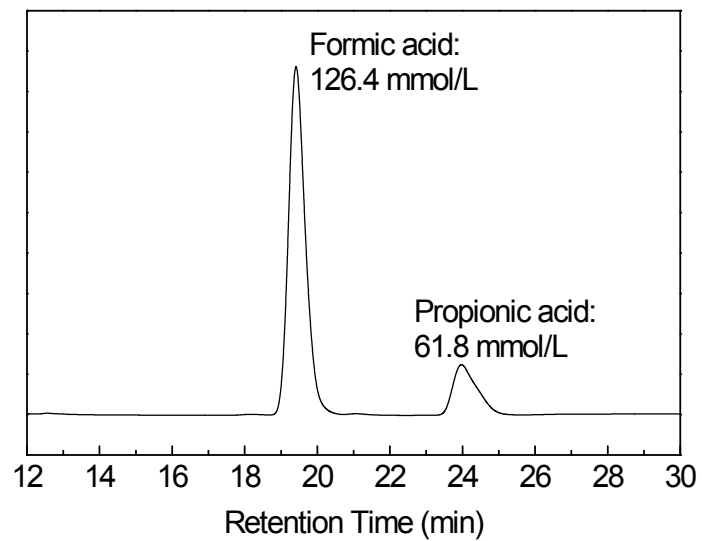

**Fig. S8** HPLC chromatogram after the reaction of propanol with  $\text{NaHCO}_3$  (1 mol/L  $\text{NaHCO}_3$ , 1 mol/L propanol, 2 h, 300 °C, 50% water filling).

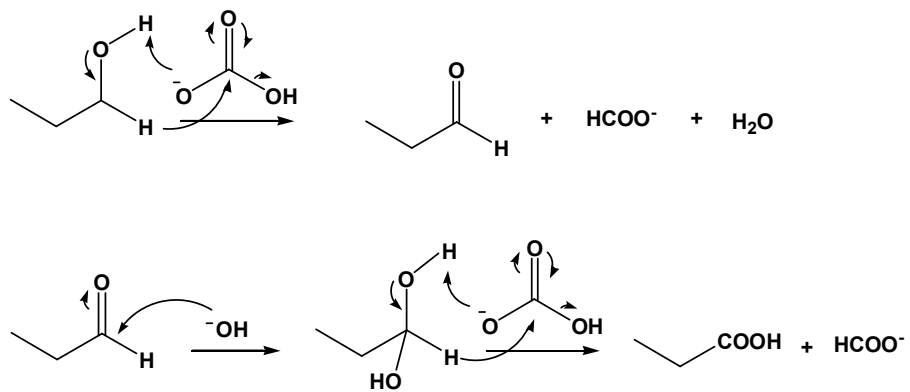

**Fig. S9** Proposed mechanism for  $\text{NaHCO}_3$  reduction with propanol.

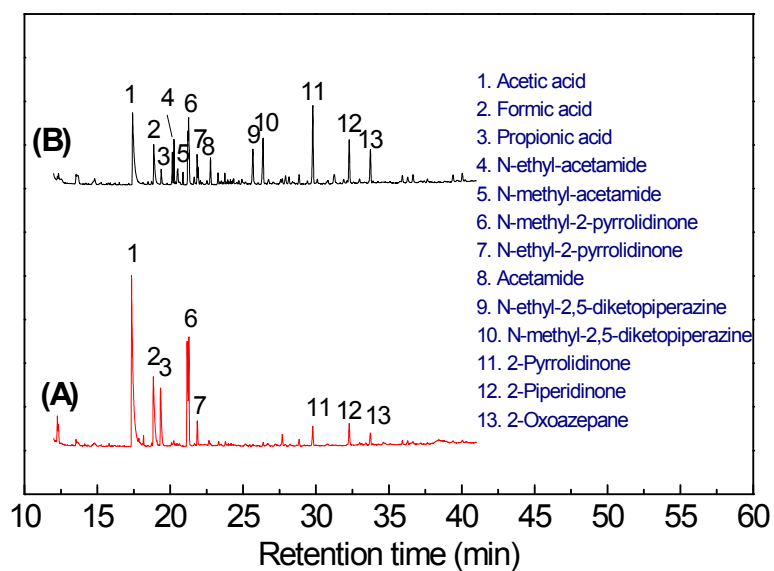

**Fig. S10** GC-MS chromatograms of liquid samples after the reaction of *Chlorella* with (A) or without  $\text{NaHCO}_3$  (B) (Reaction condition: 1.2 mol/L  $\text{NaHCO}_3$ , 0.36 g *Chlorella*, 2 h, 300 °C, 50% water filling).

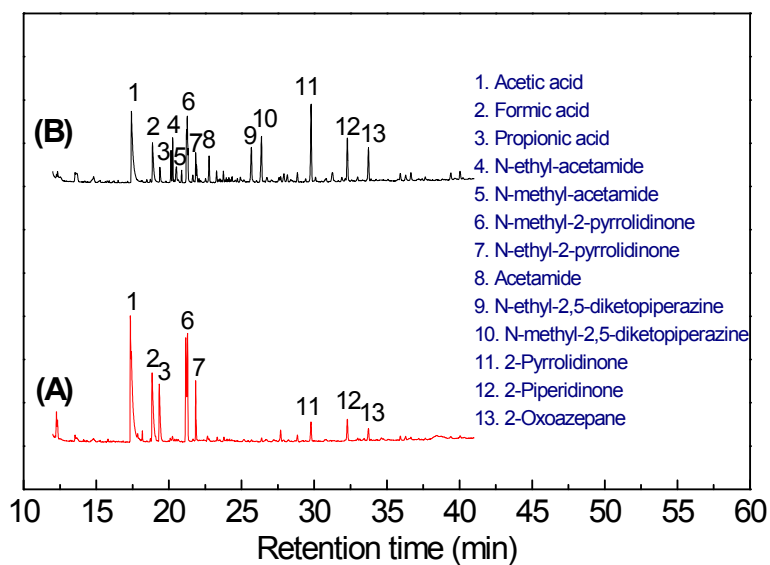

**Fig. S11** GC-MS chromatograms of liquid samples after the reaction of *Chlorella* residue with (A) or without NaHCO<sub>3</sub> (B) (Reaction condition: 1.2 mol/L NaHCO<sub>3</sub>, 0.35 g *Chlorella* residue, 2 h, 300 °C, 50% water filling).

**References:**

1. F. Jin, A. Kishita, T. Moriya and H. Enomoto, *J. Supercrit. Fluids*, 2001, **19**, 251-262.
2. C. I. Waslien and W. Oswald, *Crit. Rev. Food Sci. & Nutri.*, 1975, **6**, 77-151.
3. B. J. Hudson and I. G. Karis, *J. Sci. Food. Agric.*, 1974, **25**, 759-763.
